# Supplementary material
Source: Springer Nature journal article supplement (https://www.springermedizin.de/resource/supplementary/12958_2013_1214_MOESM2_ESM.pdf/9567064)

## Embryos with ectopic PGCs

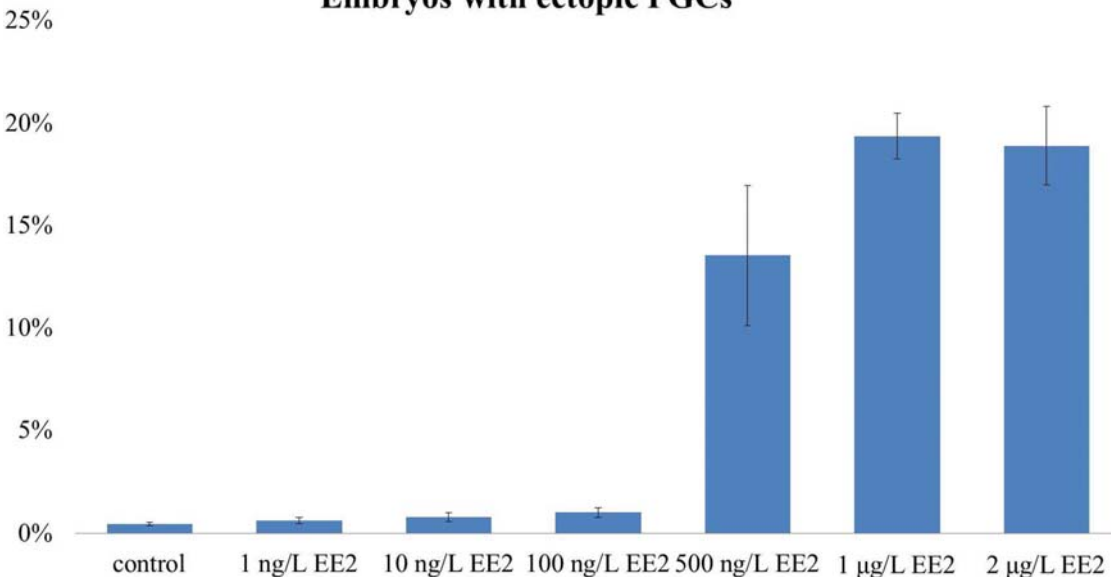

Supplement: MOESM2 [file 9567064]
